# Supplementary material for: Does Supplementary Information Add Value to Functional Food? Evidence from a Choice Experiment in China
Source: MDPI journal article supplement (doi:10.3390/nu14204424), 2022-10-21
Supplement: s1 [file s1]

**Table S1: Example questions of survey questionnaire**

The first part of the questionnaire concerns the daily purchase experience of eggs and self-reported perceived importance of various aspects. The second part is the cognitive test of nutritional elements, nutritional fortification technology, dietary nutrition cognition. The third part is the information treatment experiment (the participants in the control group were not shown any intervention information). The fourth part is the choice experiment. The fifth part is the survey on demographic information.

**Section 1: Daily Purchase**

**Q1: What types of eggs have you heard of? [Multiple Choice]**

**Q2: What types of eggs have you purchased (bought) in the last six months? [Multiple Choice]**

**Q3: What are the eggs you often buy in the last six months? [Single Choice]**

**Q4: What types of eggs have you consumed (eaten/taken) in the last six months? [Multiple Choice]**

| Options                     | Q1 | Q2 | Q3 | Q4 |
|-----------------------------|----|----|----|----|
| A. Selenium enriched eggs   |    |    |    |    |
| B. Omega-3 enriched eggs    |    |    |    |    |
| C. Ordinary eggs            |    |    |    |    |
| D. Organic eggs             |    |    |    |    |
| E. Folic acid enriched eggs |    |    |    |    |

**Q5: You've heard of functional eggs, but why didn't you buy them? [when Q1=A/B/E and Q2≠A/B/E]**

- A. I know nothing about the nutritional content, efficacy, and value.
- B. I do not trust the functional eggs are able to supplement nutrients to human body.
- C. I do not trust the safety of functional eggs.
- D. I know nothing about the nutritionally fortification technology.
- E. Functional eggs are expensive to me.
- F. I do not know where to buy.

**Q6: What factors do you consider when buying egg products? [Multiple Choice]**

**Q7: What is the most important consideration? [Single Choice]**

| Options                | Q5 | Q6 |
|------------------------|----|----|
| A. Date of manufacture |    |    |
| B. Expiration date     |    |    |
| C. Brand               |    |    |
| D. Place of Origin     |    |    |
| E. Freshness           |    |    |
| F. Package             |    |    |
| G. Price               |    |    |
| H. Promotion/Discount  |    |    |
| I. Nutritive value     |    |    |

|                                                                                                                                                                          |  |  |
|--------------------------------------------------------------------------------------------------------------------------------------------------------------------------|--|--|
| J. Animal welfare in production process<br>K. Food safety certification<br>L. Egg appearance<br>M. Purchase channel<br>N. Taste<br>O. Government regulation<br>P. Others |  |  |
|--------------------------------------------------------------------------------------------------------------------------------------------------------------------------|--|--|

**Q8: Are you willing to try to buy functional eggs (such as "selenium enriched eggs", "omega-3 eggs", "folic acid eggs", etc.) in the future? [Single Choice]**

- A. Very reluctant
- B. Less likely
- C. Moderately
- D. More likely
- E. Very glad to try

**Trap Question#1**

## Section 2: Cognition Test

**Q1: Do you know the function of unsaturated fatty acids? [Single Choice]**

**Q2: Do you know the function of folic acid? [Single Choice]**

**Q3: Do you know the function of selenium? [Single Choice]**

| Options<br>(1 ~ 5 indicates the degree of<br>what you know)                                                           | Q1 | Q2 | Q3 |
|-----------------------------------------------------------------------------------------------------------------------|----|----|----|
| A. Not at all (1)<br>B. Do not quite well know (2)<br>C. Not sure (3)<br>D. A little bit (4)<br>E. Fully aware of (5) |    |    |    |

**Q4: \_\_\_\_ deficiency is an important cause of Creutzfeldt-Jakob disease, macrosomia, and lower immunity.**

- A. Selenium
- B. Zinc
- C. Folic acid
- D. Iron

**Q5: Which of the following options is NOT a deficiency of folic acid?**

- A. Endemic goiter
- B. Megaloblastic anemia
- C. Cleft lip and palate
- D. Neural tube malformation

**Q6: Omega-3 unsaturated fatty acids DO NOT include which of the following options?**

---

A. DHA

B. EPA

C. ALA

D. RDA

**Q7: Do you think it is correct to say that "Omega-3 and Omega-6 are both unsaturated fatty acids, so either one can be supplemented"?**

A. Correct

B. Wrong

C. Unsure

**Q8: Do you think it is correct to say that "the principles of nutritional fortification and genetic modification are the same"?**

A. Correct

B. Wrong

C. Unsure

**Q9: Do you trust the nutrient contents have health benefits to human body? 1 means very distrustful and 5 means very trustful. How much do you trust? Please fill in the blank \_\_\_\_.**

**Q10: Are you aware of and do you agree with the following statements?**

| Statements                                                                                                                                                                                   | Agree | Disagree | Do not know |
|----------------------------------------------------------------------------------------------------------------------------------------------------------------------------------------------|-------|----------|-------------|
| Fat and cholesterol are harmful to the body and should be avoided.                                                                                                                           |       |          |             |
| Unsaturated fatty acids are more beneficial to human health than saturated fatty acids.                                                                                                      |       |          |             |
| Excessive pork intake can increase the risk of obesity, type 2 diabetes, and other morbidity.                                                                                                |       |          |             |
| Nuts are rich in lipids and polyunsaturated fatty acids, protein, and are a useful addition to the diet.                                                                                     |       |          |             |
| Deep-sea fish has a higher proportion of polyunsaturated fatty acids in the overall fat content compared to regular red meat, which encourages increased dietary intake of seaweed and fish. |       |          |             |

### Section 3: Information treatment

### Section 4: Choice experiment

Trap question #2 and Repeat Section 2

### Section 5: Demographic information

**Q1: What is your gender? [Single Choice]**

- A. Female
- B. Male
- C. Others

**Q3: What is your age? \_\_\_\_\_**

**Q4: What is your education level (including ongoing education)? [Single Choice]**

- A. High school
- B. Bachelor degree
- C. Graduate degree or above

**Q5. What is your total annual household income (including all bonus and other additional income)? [Single Choice]**

- A. Below ¥ 50,000
- B. ¥ 50,000 - ¥ 100,000
- C. ¥ 110,000 - ¥ 150,000
- D. ¥ 160,000 - ¥ 200,000
- E. ¥ 210,000 - ¥ 300,000
- F. ¥ 310,000 - ¥ 400,000
- G. ¥ 410,000 - ¥ 500,000
- H. ¥ 510,000 - ¥ 700,000
- I. ¥ 710,000 - One million
- J. One million above

**Q6: What's your family status? [Single Choice]**

- A. Single
- B. Married without children
- C. Married and have children

**Q7: Are you usually involved in making decisions about your family's daily food consumption?**

- A. Yes
- B. No

***Note:** The above questions were translated from the actual research questionnaire. There are still some questions in the actual research questionnaire that involve data that have not yet been published and therefore are not included in this sample questionnaire.*
